# Supplementary material
Source: PubMed Central journal article supplement (PMC4287188)
Supplement: Supp_Fig3.pdf [file Supp_Fig3.pdf]

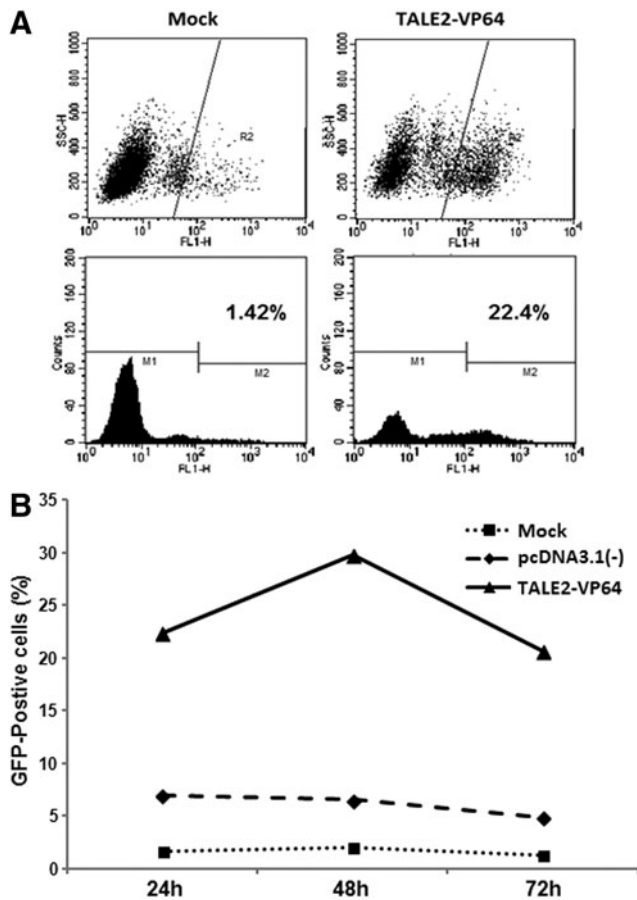

**SUPPLEMENTARY FIG. S3.** Reactivation of latent HIV-1 in latently infected C11 cells by TALE2-VP64. (A) C11 cells were untransfected (mock) or transfected with pcDNA3.1(-) ( $2 \mu\text{g}$ ) or TALE2-VP64 ( $2 \mu\text{g}$ ). Then, 24 h posttreatment, the percentage of cells expressing GFP was measured via flow cytometry to determine the extent of reactivation. Results are presented as fluorescence histograms. (B) Time dependence of the effect of TALE2-VP64 on C11 cells. The level of GFP expression in C11 cells was measured at 24, 48, and 72 h using standard flow cytometric techniques. The data are presented as the means  $\pm$  standard deviations of three independent experiments.
