# Supplementary material
Source: PubMed Central journal article supplement (PMC4287188)
Supplement: Supp_Fig4.pdf [file Supp_Fig4.pdf]

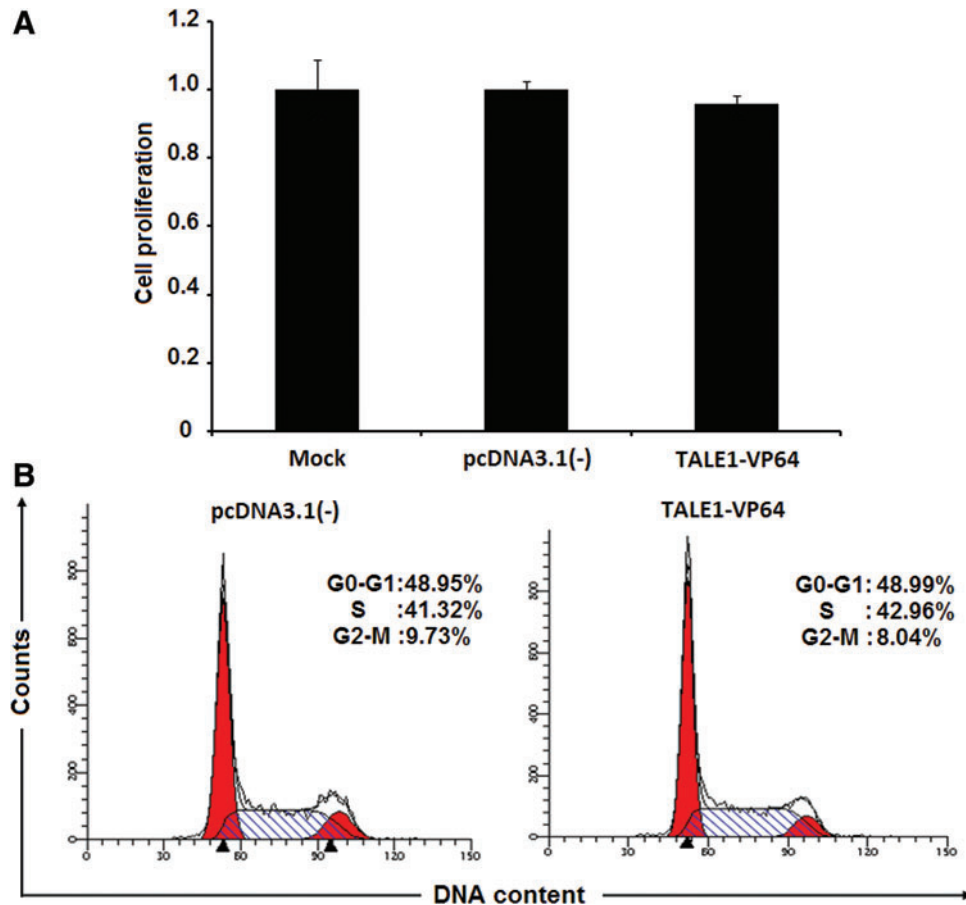

**SUPPLEMENTARY FIG. S4.** Effects of TALE1-VP64 on cell proliferation and cell cycle distribution in HEK-293 cells. **(A)** HEK-293 cells were untransfected (mock) or transfected with pcDNA3.1(-) or TALE1-VP64. Then, 48 h post-transfection, the cell viability was measured using a CCK-8 kit (Dojindo). The cell viability of the transfected groups was normalized to that of the untransfected group. The data are presented as the means  $\pm$  standard deviations of three independent experiments. **(B)** HEK-293 cells were untransfected or transfected with pcDNA3.1(-) or TALE1-VP64. Then, 48 h posttransfection, the distribution of the cells in each phase of the cell cycle was determined based on their DNA content via propidium iodide staining and FACS analysis.
